# Supplementary material for: Characterization of the polyphenol oxidase gene family reveals a novel microRNA involved in posttranscriptional regulation of PPOs in Salvia miltiorrhiza
Source: PubMed Central journal article supplement (PMC5356337; doi:10.1038/srep44622), 2017-03-17
Supplement: srep44622-s1.pdf [file srep44622-s1.pdf]

**Supplementary information for Scientific Reports**

**Characterization of the polyphenol oxidase gene family reveals a novel microRNA involved in posttranscriptional regulation of *PPOs* in *Salvia miltiorrhiza***

Caili Li#, Dongqiao Li#, Jiang Li, Fenjuan Shao, Shanfa Lu\*

Institute of Medicinal Plant Development, Chinese Academy of Medical Sciences & Peking Union Medical College, No.151, Malianwa North Road, Haidian District, Beijing 100193, China.

**Supplementary Table S1** Primers used for 5'-RACE of *SmPPOs*.

| Gene name      | Primer sequence (5'-3')                |
|----------------|----------------------------------------|
| <i>SmPPO13</i> | Nesting: TGGATTCCGGGTCATGCCGAGATCC     |
|                | Nested: GTCAGACATCGGTGGGCAGCAGTTCATG   |
| <i>SmPPO14</i> | Nesting: AGATCCGTGGGAGCAGGCGGGAGAT     |
|                | Nested: TTGCATGAAACTGCGCGGGTCATCG      |
| <i>SmPPO15</i> | Nesting: CGTACGTATTCCGGTGTTCAGCCTGTGCG |
|                | Nested: TGCGATTGAGTGGGTTGCGGTTGCAG     |
| <i>SmPPO16</i> | Nesting: CCTGTTTCGTAGCGGCCGGTACAGTAAGC |
|                | Nested: AGCCGCCCTCCGACAATCCTCCCTT      |
| <i>SmPPO17</i> | Nesting: TCTTCTACGCACATCACGCCAACG      |
|                | Nested: TCTTTCCTTACCCAGGGCCTCAATC      |
| <i>SmPPO18</i> | Nesting: CCCGACGACTTCAACAACGCCTCC      |
|                | Nested: GAGGATTGTTCGGAGGGCGGCTGTCT     |
| <i>SmPPO19</i> | Nesting: ATCTCTAGACGTCAACTGCTGCCCCG    |
|                | Nested: CGCTTCCGATTTTGCCTCCTGACCT      |

**Supplementary Table S2** Primers used for 3'-RACE of *SmPPOs*.

| Gene name      | Primer sequence (5'-3')           |
|----------------|-----------------------------------|
| <i>SmPPO17</i> | Nesting: CACGGAGTTTCGCTTTCTTCATAC |
|                | Nested: ACTTCGTCGGCTTTGCCTTTGGTTG |
| <i>SmPPO18</i> | Nesting: ACTTCGTCGGCTTTGCCTTTGGT  |
|                | Nested: CGCTTCCGCAGTCCTAACCTTAT   |
| <i>SmPPO19</i> | Nesting: TGGCGAGAACTTTGGCATTGACC  |
|                | Nested: CGTCGGCTTTGCCTTTGGTTGGT   |

**Supplementary Table S3** Primers used for the PCR-amplification of coding sequences of *SmPPOs*

| Gene name      | Primer sequence (5'-3')                                                      |
|----------------|------------------------------------------------------------------------------|
| <i>SmPPO1</i>  | Forward: ATGGCTTCGTCGATTCTCTCACAT<br>Reverse: GTCATCAAGCTCGATCTTGATATCATG    |
| <i>SmPPO2</i>  | Forward: ATGTCATCTGTTCTCTTTCCACCG<br>Reverse: CCACCAATGGTAATATCTTCTCCTCCA    |
| <i>SmPPO3</i>  | Forward: ATGGCATTTCCTCCACTTTCCTC<br>Reverse: TGACACCACCAATGGTAATGTCTTC       |
| <i>SmPPO4</i>  | Forward: ATGGCCTCTCTTCAATCTTCATGC<br>Reverse: CGCGACTTAACAATTTTGATACCA       |
| <i>SmPPO5</i>  | Forward: ATGGCTTCCCTTCAATCTTCTTTCTC<br>Reverse: GCGGGATGATCTTAATACCACCAAT    |
| <i>SmPPO6</i>  | Forward: ATGGCTTCCCTCTACCTTCATTGCA<br>Reverse: AGCTTTAGGTGGATTCTCAATGATCTTGA |
| <i>SmPPO7</i>  | Forward: ATGGCTTCTCTTCCATCTTCACTCA<br>Reverse: AGCAGCAACACGCGGGATAATCT       |
| <i>SmPPO8</i>  | Forward: ATGGCTTCCCTTCAATCTTCATTC<br>Reverse: ACACGCGGGATGATCTTAATACC        |
| <i>SmPPO9</i>  | Forward: ATGGCTTCTTCCCTTCAGTCCTTAAG<br>Reverse: TTTACGCTGCGCTGGGATGA         |
| <i>SmPPO10</i> | Forward: ATGGCTTCCCTTCAATCTTCATTCAC<br>Reverse: TCAAGCGGTAACACGCGGGAT        |
| <i>SmPPO11</i> | Forward: ATGGCTTCTTCCCTTATTGCTTCATG<br>Reverse: ACGCTGCGCTGGGACGATCTT        |
| <i>SmPPO12</i> | Forward: ATGGCTTCCCTTCAATCTTCATTCA<br>Reverse: AGCGGTAACACGCGGGATGATC        |
| <i>SmPPO13</i> | Forward: ATGGCTTCCCTCTACCTTCATTGC<br>Reverse: TCAAGATCTTCGGGGTGGAGAAG        |
| <i>SmPPO14</i> | Forward: ATGGCATCACTTCCGTTTTCCAC<br>Reverse: TTAAACGTAGATGATCTTGACCCAC       |
| <i>SmPPO15</i> | Forward: ATGGCTTCCCTTCAATCTTCATTC<br>Reverse: CACGCGGGATGATCTTAATACCA        |
| <i>SmPPO16</i> | Forward: ATGGGGCACCAAACCATGGC<br>Reverse: TCAAGCGGTAACACGAGGAATGATC          |
| <i>SmPPO17</i> | Forward: ATGCTCCTCGGTCTTGGAGGGC<br>Reverse: TCAAACGGGAACACGCGGGATG           |
| <i>SmPPO18</i> | Forward: ATGGCGAAGATGAGGGAGCTG<br>Reverse: TCAAGCGGTAACACGCGGGATG            |
| <i>SmPPO19</i> | Forward: ATGGCTTCCCTTCAATCTTC<br>Reverse: TCAAGCAGTAACACGCGGGATG             |

**Supplementary Table S4** Gene names of *PPOs*.

| <b>Gene name</b>                   | <b>Accession no.</b> |
|------------------------------------|----------------------|
| <b><i>Populus trichocarpa</i></b>  |                      |
| <i>PtPPO1</i>                      | Potri.011G108300     |
| <i>PtPPO2</i>                      | Potri.001G387900     |
| <i>PtPPO3</i>                      | Potri.011G047300     |
| <i>PtPPO4</i>                      | Potri.T062100        |
| <i>PtPPO5</i>                      | Potri.001G388600     |
| <i>PtPPO6</i>                      | Potri.001G388400     |
| <i>PtPPO7</i>                      | Potri.001G388300     |
| <i>PtPPO8</i>                      | Potri.T061900        |
| <i>PtPPO9</i>                      | Potri.001G388100     |
| <i>PtPPO10</i>                     | Potri.011G108200     |
| <i>PtPPO11</i>                     | Potri.001G388900     |
| <i>PtPPO12</i>                     | Potri.001G388800     |
| <i>PtPPO13</i>                     | Potri.004G156500     |
| <i>PtPPO14</i>                     | Potri.001G388200     |
| <i>PtPPO15</i>                     | Potri.T062200        |
| <i>PtPPO16</i>                     | Potri.001G388000     |
| <b><i>Glycine max</i></b>          |                      |
| GmPPO1                             | Glyma06g42170.1      |
| GmPPO2                             | Glyma07g31270.1      |
| GmPPO3                             | Glyma07g31280.1      |
| GmPPO4                             | Glyma07g31300.1      |
| GmPPO5                             | Glyma07g31310.1      |
| GmPPO6                             | Glyma13g25150.1      |
| GmPPO7                             | Glyma13g25180.1      |
| GmPPO8                             | Glyma13g25260.1      |
| GmPPO9                             | Glyma13g31590.1      |
| GmPPO10                            | Glyma15g07710.1      |
| GmPPO11                            | Glyma18g45900.1      |
| <b><i>Zea mays</i></b>             |                      |
| ZmPPO1                             | GRMZM2G108103_T01    |
| ZmPPO2                             | GRMZM2G121605_T01    |
| ZmPPO3                             | AC233851.1_FGT017    |
| ZmPPO4                             | GRMZM2G319062_T01    |
| ZmPPO5                             | GRMZM2G137909_T01    |
| ZmPPO6                             | AC209206.3_FGT014    |
| <b><i>Oryza sativa</i></b>         |                      |
| OsaPPO1                            | LOC_Os01g58100.1     |
| OsaPPO2                            | LOC_Os04g53300.1     |
| <b><i>Phycomitrella patens</i></b> |                      |
| PpPPO1                             | AAX69084.1           |
| PpPPO2                             | XP_001770109.1       |

|         |                |
|---------|----------------|
| PpPPO3  | XP_001785624.1 |
| PpPPO4  | XP_001752158.1 |
| PpPPO5  | XP_001773770.1 |
| PpPPO6  | XP_001785949.1 |
| PpPPO7  | XP_001767174.1 |
| PpPPO8  | XP_001766337.1 |
| PpPPO9  | XP_001766259.1 |
| PpPPO10 | XP_001766553.1 |
| PpPPO11 | XP_001755077.1 |
| PpPPO12 | XP_001785245.1 |

**Supplementary Table S5** Primers used for quantitative real-time RT-PCR of *SmPPOs*

| Gene name      | Primer sequence (5'-3')         |
|----------------|---------------------------------|
| <i>SmPPO1</i>  | Forward: GAAGAGGAGCAAGAAGGAGAAG |
|                | Reverse: TCGTCCTCGTCGTTGATGTA   |
| <i>SmPPO2</i>  | Forward: TCGTGAGGTTTGAGGTGTTC   |
|                | Reverse: AGCCTGATCTTGCTCTTCAC   |
| <i>SmPPO3</i>  | Forward: GGTAAGGGTGTGGTGGATAG   |
|                | Reverse: TATTTGGCGGTGTTCGATCTC  |
| <i>SmPPO4</i>  | Forward: GCCTTCTACTCCCATCACTCTA |
|                | Reverse: CGTTGAGGTAGTCAGGTTTGTT |
| <i>SmPPO5</i>  | Forward: CGGTCAATCTCAAGGACATCT  |
|                | Reverse: CCTTTGGTTGGTTTGGACAC   |
| <i>SmPPO6</i>  | Forward: GCATGTGGACTCTATGGAAGG  |
|                | Reverse: GAAAGAGGCGTTGAGGTAGTC  |
| <i>SmPPO7</i>  | Forward: CACAGTGTTCCCTCTCAAAC   |
|                | Reverse: CCTCACGAGCTTGCTGTTAT   |
| <i>SmPPO8</i>  | Forward: CAAAGTGTTCCCTCTCACTCTC |
|                | Reverse: AACTCACCAGCTTGGAACATC  |
| <i>SmPPO9</i>  | Forward: CTGAAGAAGGCGGTTAGAGTTT |
|                | Reverse: TTGGTGCAATCGGTCTCTATG  |
| <i>SmPPO10</i> | Forward: GGTGCATATCGAAGAGTGGAT  |
|                | Reverse: GAGAGTGAGAGGGAACAGATTG |
| <i>SmPPO11</i> | Forward: GGAGCTCTACGAGAACATTGAC |
|                | Reverse: GACGATCTTGACACCACCAA   |
| <i>SmPPO12</i> | Forward: CAATCTGTTCCCTCTCACTCTC |
|                | Reverse: ACCTCACGACCTTCAAACATC  |
| <i>SmPPO13</i> | Forward: TGTGGACTCTGTGGCAATC    |
|                | Reverse: GCGTCCTCGTCGTAGAATAAG  |
| <i>SmPPO14</i> | Forward: CGACTACGGCTAAGGCAATTA  |
|                | Reverse: CTCCTTCTCCTTCTTGCTTCTC |

|                |                                                                     |
|----------------|---------------------------------------------------------------------|
| <i>SmPPO15</i> | Forward: AACTCCATGGATGGCTTACAG<br>Reverse: ACAGTGTTGGTGAGAGTGATG    |
| <i>SmPPO16</i> | Forward: CGTGTATGAACACAGCGAAAC<br>Reverse: GAGAGTGAGAGGGAACAGATTG   |
| <i>SmPPO17</i> | Forward: CAATGTGTTCCCTCTCACTCTC<br>Reverse: AACTCACCAGCTTGGAACATATC |
| <i>SmPPO18</i> | Forward: TCGTGAGGTTTCGATGTGTTC<br>Reverse: CTTTCCGCAGTCCTAACCTTAT   |
| <i>SmPPO19</i> | Forward: CCTCTCACTCTCACCAAGACTA<br>Reverse: CCTCACGATCTTGGACCTTTC   |

---

**Supplementary Table S6** Primers used for analysis of Smi-miR12112-directed cleavage of *SmPPOs*

| Gene name      | Primer sequence (5'-3')                                               |
|----------------|-----------------------------------------------------------------------|
| <i>SmPPO3</i>  | Nesting: GCAGCAAGCAGTACAAGTAGTG<br>Nested: GTGTAGACGATGATTCACAGAAG    |
| <i>SmPPO5</i>  | Nesting: GTCGACAAATCTCAAGCAACATGGAG<br>Nested: GAAACATTGGCGATGGATGCAG |
| <i>SmPPO9</i>  | Nesting: CGGTTAACCGAACCATAAACCGG<br>Nested: GATATGTAGATTTTATTGTGGAGC  |
| <i>SmPPO11</i> | Nesting: GCTTCCCCTCTCTCACACACACAC<br>Nested: CATTGGAGGAATTGGAACATGCG  |
| <i>SmPPO13</i> | Nesting: GGTCTGCCTCCATGGAACGATTGTC<br>Nested: GGAGAAATGCTAGCGTAGGGC   |

---

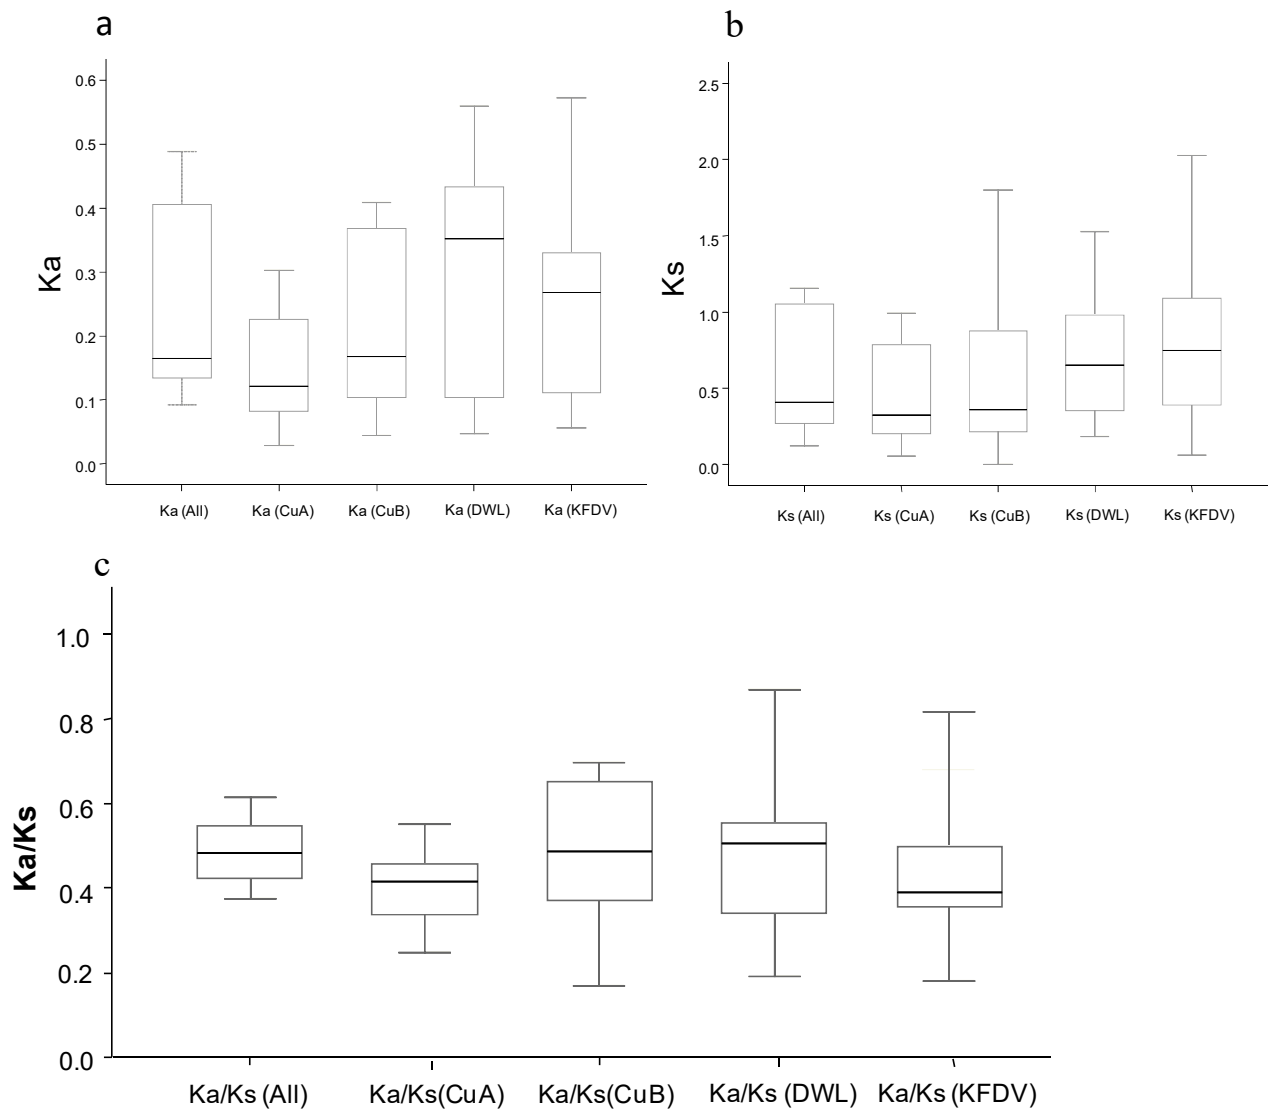

**Supplementary Figure S1 Divergence of different classes in SmPPOs.** (a) the Ka values of different classes in SmPPOs; (b) the Ks values of different classes in SmPPOs; (c) the Ka/Ks ratios of different classes in SmPPOs.
